# Supplementary material
Source: Springer Nature journal article supplement (https://www.springermedizin.de/resource/supplementary/12943_2009_566_MOESM9_ESM.pdf/9554984)

(a)

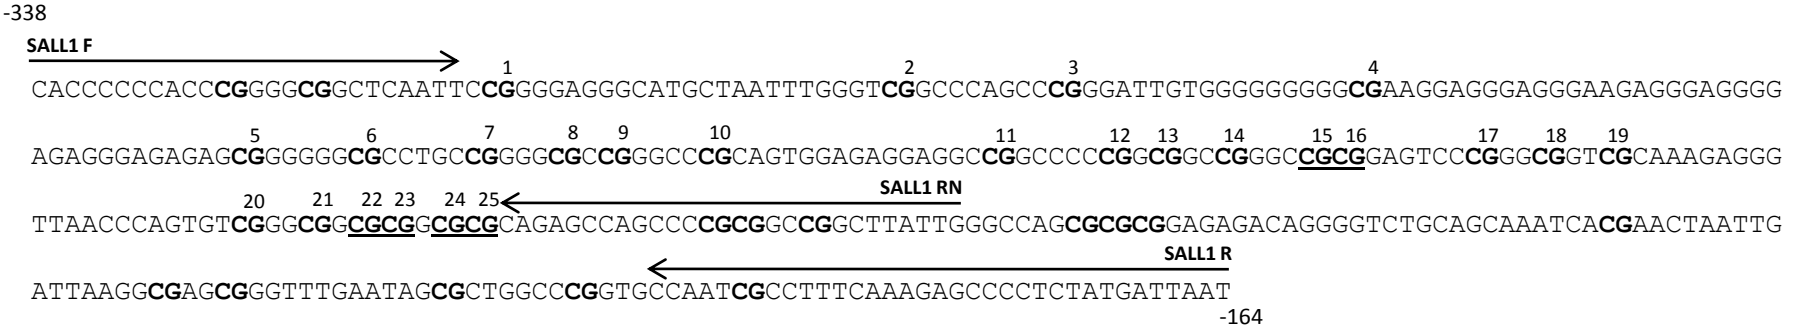

(b)

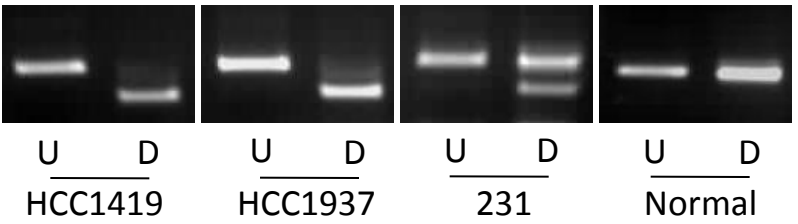

(c)

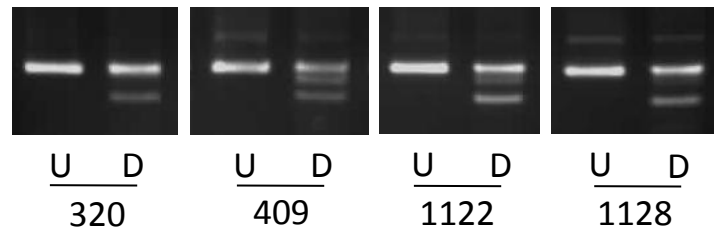

(d)

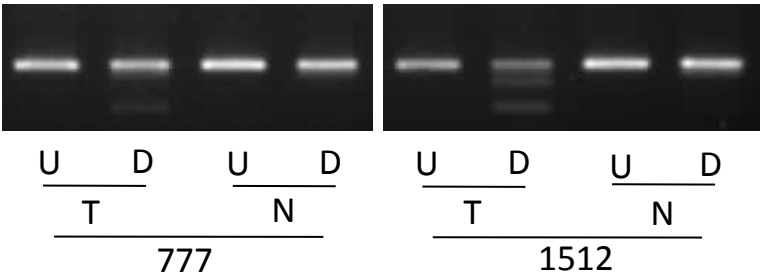

(e)

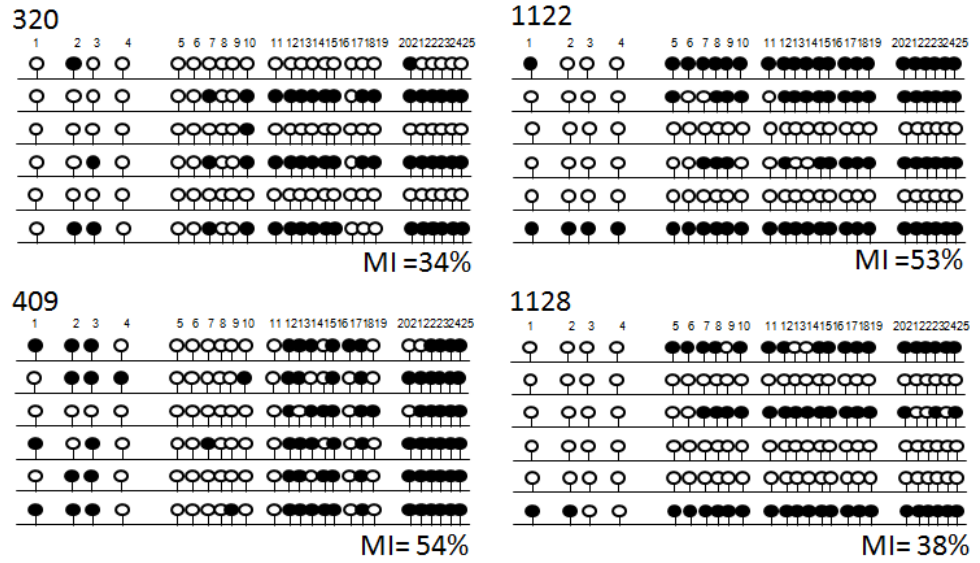

(f)

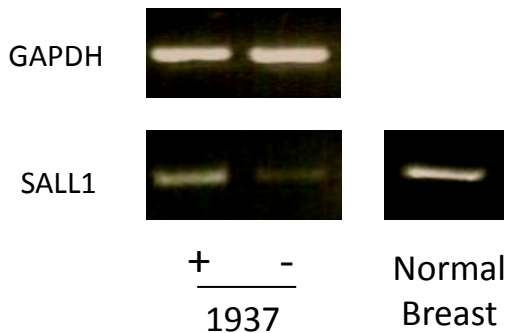

Supplement: MOESM9 [file 9554984]
